# Supplementary material for: Metallomacrocycle-supported interpenetration networks assembled from binary N-containing ligands
Source: Royal Society of Chemistry journal article supplement (doi:10.1039/c6ce00057f), 2016-01-01

## checkCIF/PLATON report

You have not supplied any structure factors. As a result the full set of tests cannot be run.

THIS REPORT IS FOR GUIDANCE ONLY. IF USED AS PART OF A REVIEW PROCEDURE FOR PUBLICATION, IT SHOULD NOT REPLACE THE EXPERTISE OF AN EXPERIENCED CRYSTALLOGRAPHIC REFEREE.

No syntax errors found.      CIF dictionary      Interpreting this report

### Datablock: 1

---

Bond precision:    C-C = 0.0078 Å

Wavelength=0.71073

Cell:                a=11.2652(15)        b=12.2246(15)        c=12.2787(18)  
                      alpha=94.758(11)    beta=115.462(14)    gamma=111.252(12)  
Temperature:    293 K

|                        | Calculated                            | Reported                  |
|------------------------|---------------------------------------|---------------------------|
| Volume                 | 1364.4(4)                             | 1364.4(3)                 |
| Space group            | P -1                                  | P-1                       |
| Hall group             | -P 1                                  | -P1                       |
| Moiety formula         | C26 H18 N12 O Zn, 0.5(H4 O2), 2(H2 O) | C26 H18 N12 O Zn, 3(H2 O) |
| Sum formula            | C26 H24 N12 O4 Zn                     | C26 H24 N12 O4 Zn         |
| Mr                     | 633.96                                | 633.94                    |
| Dx, g cm <sup>-3</sup> | 1.543                                 | 1.543                     |
| Z                      | 2                                     | 2                         |
| Mu (mm <sup>-1</sup> ) | 0.959                                 | 0.959                     |
| F000                   | 652.0                                 | 652.0                     |
| F000'                  | 652.77                                |                           |
| h,k,lmax               | 13,14,14                              | 13,14,14                  |
| Nref                   | 4815                                  | 4793                      |
| Tmin,Tmax              | 0.813,0.891                           | 0.983,1.000               |
| Tmin'                  | 0.810                                 |                           |

Correction method= # Reported T Limits: Tmin=0.983 Tmax=1.000  
AbsCorr = MULTI-SCAN

Data completeness= 0.995

Theta(max)= 25.000

R(reflections)= 0.0575( 3537)

wR2(reflections)= 0.1616( 4793)

S = 1.031

Npar= 388

---

The following ALERTS were generated. Each ALERT has the format

**test-name\_ALERT\_alert-type\_alert-level.**

Click on the hyperlinks for more details of the test.

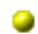

### Alert level C

|                   |                   |                    |                                      |         |       |
|-------------------|-------------------|--------------------|--------------------------------------|---------|-------|
| PLAT220_ALERT_2_C | Large Non-Solvent | N                  | Ueq(max)/Ueq(min) Range              | 3.2     | Ratio |
| PLAT241_ALERT_2_C | High              | 'MainMol'          | Ueq as Compared to Neighbors of      | N5      | Check |
| PLAT241_ALERT_2_C | High              | 'MainMol'          | Ueq as Compared to Neighbors of      | N6      | Check |
| PLAT242_ALERT_2_C | Low               | 'MainMol'          | Ueq as Compared to Neighbors of      | N7      | Check |
| PLAT242_ALERT_2_C | Low               | 'MainMol'          | Ueq as Compared to Neighbors of      | C14     | Check |
| PLAT250_ALERT_2_C | Large             | U3/U1              | Ratio for Average U(i,j) Tensor .... | 2.3     | Note  |
| PLAT341_ALERT_3_C | Low               | Bond Precision on  | C-C Bonds .....                      | 0.00777 | Ang.  |
| PLAT355_ALERT_3_C | Long              | O-H (X0.82,N0.98A) | O2 - H2B ..                          | 1.01    | Ang.  |

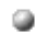

### Alert level G

|                   |                                                  |        |        |
|-------------------|--------------------------------------------------|--------|--------|
| PLAT004_ALERT_5_G | Polymeric Structure Found with Maximum Dimension | 2      | Info   |
| PLAT005_ALERT_5_G | No Embedded Refinement Details found in the CIF  | Please | Do !   |
| PLAT007_ALERT_5_G | Number of Unrefined Donor-H Atoms .....          | 6      | Report |
| PLAT042_ALERT_1_G | Calc. and Reported MoietyFormula Strings Differ  | Please | Check  |
| PLAT093_ALERT_1_G | No s.u.'s on H-positions, Refinement Reported as | mixed  | Check  |
| PLAT199_ALERT_1_G | Reported _cell_measurement_temperature .....     | 293    | Check  |
| PLAT200_ALERT_1_G | Reported _diffraction_temperature .....          | 293    | Check  |
| PLAT899_ALERT_4_G | SHELXL97 is Deprecated and Succeeded by SHELXL   | 2014   | Note   |

0 **ALERT level A** = Most likely a serious problem - resolve or explain  
0 **ALERT level B** = A potentially serious problem, consider carefully  
8 **ALERT level C** = Check. Ensure it is not caused by an omission or oversight  
8 **ALERT level G** = General information/check it is not something unexpected

4 ALERT type 1 CIF construction/syntax error, inconsistent or missing data  
6 ALERT type 2 Indicator that the structure model may be wrong or deficient  
2 ALERT type 3 Indicator that the structure quality may be low  
1 ALERT type 4 Improvement, methodology, query or suggestion  
3 ALERT type 5 Informative message, check

## Datablock: 2

Bond precision: C-C = 0.0043 A

Wavelength=0.71073

|              |                 |                |                 |
|--------------|-----------------|----------------|-----------------|
| Cell:        | a=8.2082(6)     | b=10.6317(8)   | c=12.4526(10)   |
|              | alpha=79.480(7) | beta=74.303(7) | gamma=69.897(7) |
| Temperature: | 293 K           |                |                 |

|                | Calculated       | Reported         |
|----------------|------------------|------------------|
| Volume         | 977.60(14)       | 977.60(13)       |
| Space group    | P -1             | P-1              |
| Hall group     | -P 1             | -P1              |
| Moiety formula | C20 H13 Cd N10 O | C20 H13 Cd N10 O |
| Sum formula    | C20 H13 Cd N10 O | C20 H13 Cd N10 O |
| Mr             | 521.81           | 521.80           |
| Dx,g cm-3      | 1.773            | 1.773            |
| Z              | 2                | 2                |
| Mu (mm-1)      | 1.155            | 1.155            |
| F000           | 518.0            | 518.0            |
| F000'          | 516.52           |                  |
| h,k,lmax       | 9,12,14          | 9,12,14          |
| Nref           | 3446             | 3432             |
| Tmin,Tmax      | 0.812,0.871      | 0.958,1.000      |
| Tmin'          | 0.812            |                  |

Correction method= # Reported T Limits: Tmin=0.958 Tmax=1.000  
AbsCorr = MULTI-SCAN

Data completeness= 0.996                      Theta(max)= 25.000

R(reflections)= 0.0256( 3126)              wR2(reflections)= 0.0550( 3432)

S = 1.053                                      Npar= 289

The following ALERTS were generated. Each ALERT has the format

**test-name\_ALERT\_alert-type\_alert-level.**

Click on the hyperlinks for more details of the test.

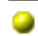

#### Alert level C

PLAT250\_ALERT\_2\_C Large U3/U1 Ratio for Average U(i,j) Tensor .... 2.2 Note

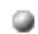

#### Alert level G

|                                                                    |              |
|--------------------------------------------------------------------|--------------|
| PLAT004_ALERT_5_G Polymeric Structure Found with Maximum Dimension | 3 Info       |
| PLAT005_ALERT_5_G No Embedded Refinement Details found in the CIF  | Please Do !  |
| PLAT093_ALERT_1_G No s.u.'s on H-positions, Refinement Reported as | mixed Check  |
| PLAT154_ALERT_1_G The s.u.'s on the Cell Angles are Equal ..(Note) | 0.007 Degree |
| PLAT199_ALERT_1_G Reported _cell_measurement_temperature ..... (K) | 293 Check    |
| PLAT200_ALERT_1_G Reported _diffrn_ambient_temperature ..... (K)   | 293 Check    |
| PLAT804_ALERT_5_G Number of ARU-Code Packing Problem(s) in PLATON  | 13 Info      |

- 0 **ALERT level A** = Most likely a serious problem - resolve or explain
  - 0 **ALERT level B** = A potentially serious problem, consider carefully
  - 1 **ALERT level C** = Check. Ensure it is not caused by an omission or oversight
  - 7 **ALERT level G** = General information/check it is not something unexpected
- 4 ALERT type 1 CIF construction/syntax error, inconsistent or missing data

1 ALERT type 2 Indicator that the structure model may be wrong or deficient  
 0 ALERT type 3 Indicator that the structure quality may be low  
 0 ALERT type 4 Improvement, methodology, query or suggestion  
 3 ALERT type 5 Informative message, check

## Datablock: 3

Bond precision: C-C = 0.0070 A Wavelength=0.71073

Cell: a=28.6376(15) b=10.5812(4) c=22.7685(10)  
 alpha=90 beta=90 gamma=90

Temperature: 293 K

|                | Calculated                   | Reported                     |
|----------------|------------------------------|------------------------------|
| Volume         | 6899.3(5)                    | 6899.3(5)                    |
| Space group    | P c c a                      | P c c a                      |
| Hall group     | -P 2a 2ac                    | -P 2a 2ac                    |
| Moiety formula | C26 H20 Cd N12 O2, C4 H9 N O | C26 H20 Cd N12 O2, C4 H9 N O |
| Sum formula    | C30 H29 Cd N13 O3            | C30 H29 Cd N13 O3            |
| Mr             | 732.07                       | 732.06                       |
| Dx,g cm-3      | 1.410                        | 1.410                        |
| Z              | 8                            | 8                            |
| Mu (mm-1)      | 0.684                        | 0.684                        |
| F000           | 2976.0                       | 2976.0                       |
| F000'          | 2970.45                      |                              |
| h,k,lmax       | 34,12,27                     | 34,12,26                     |
| Nref           | 6093                         | 6076                         |
| Tmin,Tmax      | 0.884,0.921                  | 0.934,1.000                  |
| Tmin'          | 0.884                        |                              |

Correction method= # Reported T Limits: Tmin=0.934 Tmax=1.000  
 AbsCorr = MULTI-SCAN

Data completeness= 0.997 Theta(max)= 25.000

R(reflections)= 0.0517( 4213) wR2(reflections)= 0.1458( 6076)

S = 1.047 Npar= 518

The following ALERTS were generated. Each ALERT has the format  
**test-name\_ALERT\_alert-type\_alert-level.**  
 Click on the hyperlinks for more details of the test.

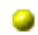

### Alert level C

PLAT250\_ALERT\_2\_C Large U3/U1 Ratio for Average U(i,j) Tensor .... 2.6 Note  
 PLAT309\_ALERT\_2\_C Single Bonded Oxygen (C-O > 1.3 Ang) ..... 03 Check

---

## ● Alert level G

|                   |                                                  |        |        |
|-------------------|--------------------------------------------------|--------|--------|
| PLAT002_ALERT_2_G | Number of Distance or Angle Restraints on AtSite | 20     | Note   |
| PLAT003_ALERT_2_G | Number of Uiso or Uij Restrained non-H Atoms ... | 56     | Report |
| PLAT004_ALERT_5_G | Polymeric Structure Found with Maximum Dimension | 3      | Info   |
| PLAT005_ALERT_5_G | No Embedded Refinement Details found in the CIF  | Please | Do !   |
| PLAT007_ALERT_5_G | Number of Unrefined Donor-H Atoms .....          | 2      | Report |
| PLAT083_ALERT_2_G | SHELXL Second Parameter in WGHT Unusually Large  | 8.76   | Why ?  |
| PLAT093_ALERT_1_G | No s.u.'s on H-positions, Refinement Reported as | mixed  | Check  |
| PLAT199_ALERT_1_G | Reported _cell_measurement_temperature .... (K)  | 293    | Check  |
| PLAT200_ALERT_1_G | Reported _diffrn_ambient_temperature .... (K)    | 293    | Check  |
| PLAT301_ALERT_3_G | Main Residue Disorder ..... Percentage =         | 24     | Note   |
| PLAT605_ALERT_4_G | Largest Solvent Accessible VOID in Structure ... | 199    | A**3   |
| PLAT720_ALERT_4_G | Number of Unusual/Non-Standard Labels .....      | 9      | Note   |
| PLAT779_ALERT_4_G | Suspect or Irrelevant (Bond) Angle in CIF .... # | 99     | Check  |
|                   | N10A -C18 -N10 1.555 1.555 1.555                 | 18.90  | Deg.   |
| PLAT779_ALERT_4_G | Suspect or Irrelevant (Bond) Angle in CIF .... # | 109    | Check  |
|                   | N11 -C21 -N11A 1.555 1.555 1.555                 | 14.80  | Deg.   |
| PLAT804_ALERT_5_G | Number of ARU-Code Packing Problem(s) in PLATON  | 14     | Info   |
| PLAT860_ALERT_3_G | Number of Least-Squares Restraints .....         | 1702   | Note   |
| PLAT869_ALERT_4_G | ALERTS Related to the use of SQUEEZE Suppressed  | !      | Info   |

---

0 **ALERT level A** = Most likely a serious problem - resolve or explain  
0 **ALERT level B** = A potentially serious problem, consider carefully  
2 **ALERT level C** = Check. Ensure it is not caused by an omission or oversight  
17 **ALERT level G** = General information/check it is not something unexpected

3 ALERT type 1 CIF construction/syntax error, inconsistent or missing data  
5 ALERT type 2 Indicator that the structure model may be wrong or deficient  
2 ALERT type 3 Indicator that the structure quality may be low  
5 ALERT type 4 Improvement, methodology, query or suggestion  
4 ALERT type 5 Informative message, check

---

## Datablock: btzb

---

Bond precision: C-C = 0.0018 A

Wavelength=0.71073

Cell: a=5.9576(7) b=16.0500(18) c=16.1222(18)

alpha=90 beta=100.028(2) gamma=90

Temperature: 293 K

|                | Calculated         | Reported           |
|----------------|--------------------|--------------------|
| Volume         | 1518.1(3)          | 1518.0(3)          |
| Space group    | P 21/c             | P 21/c             |
| Hall group     | -P 2ybc            | -P 2ybc            |
| Moiety formula | C14 H10 N8 O, H2 O | C14 H10 N8 O, H2 O |
| Sum formula    | C14 H12 N8 O2      | C14 H12 N8 O2      |
| Mr             | 324.32             | 324.32             |
| Dx,g cm-3      | 1.419              | 1.419              |
| Z              | 4                  | 4                  |
| Mu (mm-1)      | 0.103              | 0.103              |
| F000           | 672.0              | 672.0              |
| F000'          | 672.24             |                    |
| h,k,lmax       | 7,19,19            | 7,19,19            |
| Nref           | 2663               | 2661               |
| Tmin,Tmax      | 0.980,0.992        | 0.947,1.000        |
| Tmin'          | 0.980              |                    |

Correction method= # Reported T Limits: Tmin=0.947 Tmax=1.000  
AbsCorr = MULTI-SCAN

Data completeness= 0.999                      Theta(max)= 25.000

R(reflections)= 0.0332( 2255)              wR2(reflections)= 0.0886( 2661)

S = 1.078                      Npar= 217

The following ALERTS were generated. Each ALERT has the format

**test-name\_ALERT\_alert-type\_alert-level.**

Click on the hyperlinks for more details of the test.

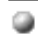

#### Alert level G

|                                                                    |             |
|--------------------------------------------------------------------|-------------|
| PLAT005_ALERT_5_G No Embedded Refinement Details found in the CIF  | Please Do ! |
| PLAT007_ALERT_5_G Number of Unrefined Donor-H Atoms .....          | 4 Report    |
| PLAT093_ALERT_1_G No s.u.'s on H-positions, Refinement Reported as | mixed Check |
| PLAT199_ALERT_1_G Reported _cell_measurement_temperature .... (K)  | 293 Check   |
| PLAT200_ALERT_1_G Reported _diffrn_ambient_temperature .... (K)    | 293 Check   |
| PLAT804_ALERT_5_G Number of ARU-Code Packing Problem(s) in PLATON  | 3 Info      |

0 **ALERT level A** = Most likely a serious problem - resolve or explain  
0 **ALERT level B** = A potentially serious problem, consider carefully  
0 **ALERT level C** = Check. Ensure it is not caused by an omission or oversight  
6 **ALERT level G** = General information/check it is not something unexpected

3 ALERT type 1 CIF construction/syntax error, inconsistent or missing data  
0 ALERT type 2 Indicator that the structure model may be wrong or deficient  
0 ALERT type 3 Indicator that the structure quality may be low  
0 ALERT type 4 Improvement, methodology, query or suggestion  
3 ALERT type 5 Informative message, check

## checkCIF publication errors

---

### **Alert level A**

PUBL010\_ALERT\_1\_A \_publ\_author\_address is missing. Author(s) address(es).

PUBL012\_ALERT\_1\_A \_publ\_section\_abstract is missing.

Abstract of paper in English.

---

### **Alert level G**

PUBL017\_ALERT\_1\_G The \_publ\_section\_references section is missing or

empty.

---

2 **ALERT level A** = Data missing that is essential or data in wrong format

1 **ALERT level G** = General alerts. Data that may be required is missing

---

## **Publication of your CIF**

You should attempt to resolve as many as possible of the alerts in all categories. Often the minor alerts point to easily fixed oversights, errors and omissions in your CIF or refinement strategy, so attention to these fine details can be worthwhile. In order to resolve some of the more serious problems it may be necessary to carry out additional measurements or structure refinements. However, the nature of your study may justify the reported deviations from journal submission requirements and the more serious of these should be commented upon in the discussion or experimental section of a paper or in the "special\_details" fields of the CIF. *checkCIF* was carefully designed to identify outliers and unusual parameters, but every test has its limitations and alerts that are not important in a particular case may appear. Conversely, the absence of alerts does not guarantee there are no aspects of the results needing attention. It is up to the individual to critically assess their own results and, if necessary, seek expert advice.

If level A alerts remain, which you believe to be justified deviations, and you intend to submit this CIF for publication in a journal, you should additionally insert an explanation in your CIF using the Validation Reply Form (VRF) below. This will allow your explanation to be considered as part of the review process.

## **Validation response form**

Please find below a validation response form (VRF) that can be filled in and pasted into your CIF.

```
# start Validation Reply Form
_vrf_PUBL010_GLOBAL
;
PROBLEM: _publ_author_address is missing. Author(s) address(es).
RESPONSE: ...
;
_vrf_PUBL012_GLOBAL
;
PROBLEM: _publ_section_abstract is missing.
RESPONSE: ...
;
# end Validation Reply Form
```

If you wish to submit your CIF for publication in Acta Crystallographica Section C or E, you should upload your CIF via the web. If you wish to submit your CIF for publication in IUCrData you should upload your CIF via the web. If your CIF is to form part of a submission to another IUCr journal, you will be asked, either during electronic submission or by the Co-editor handling your paper, to upload your CIF via our web site.

PLATON version of 07/03/2016; check.def file version of 02/03/2016

Datablock 1 - ellipsoid plot

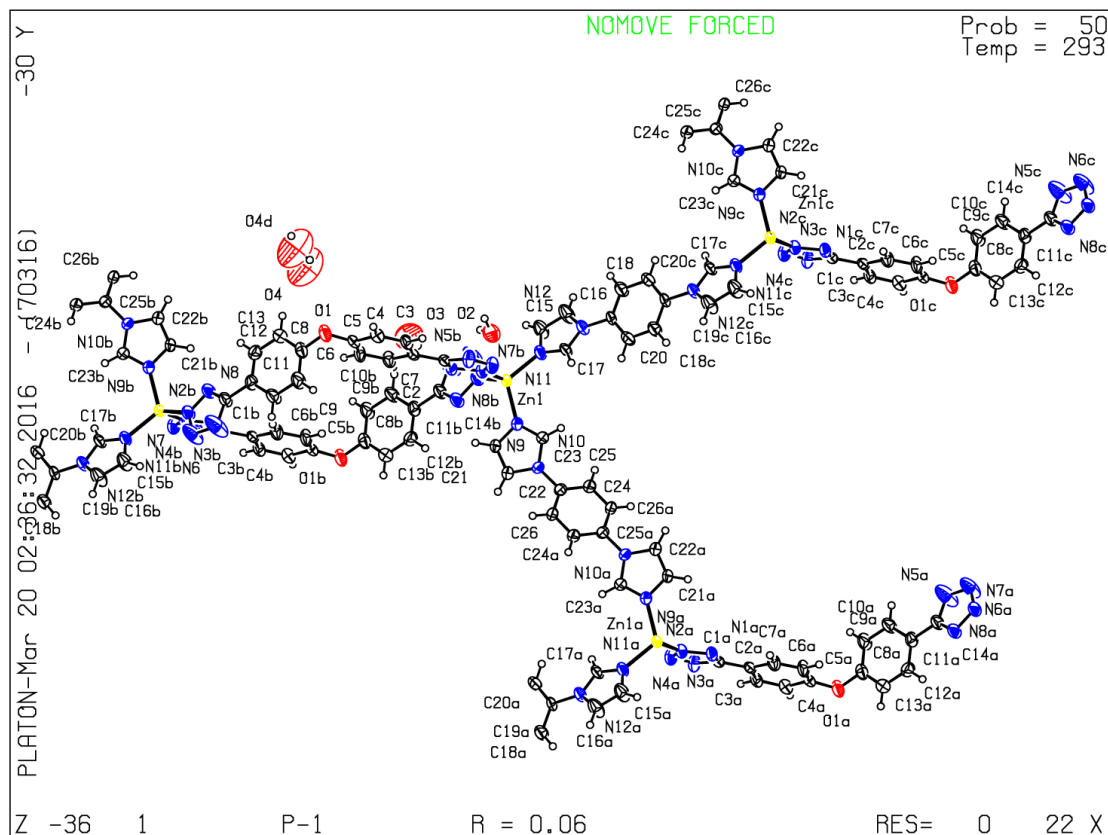



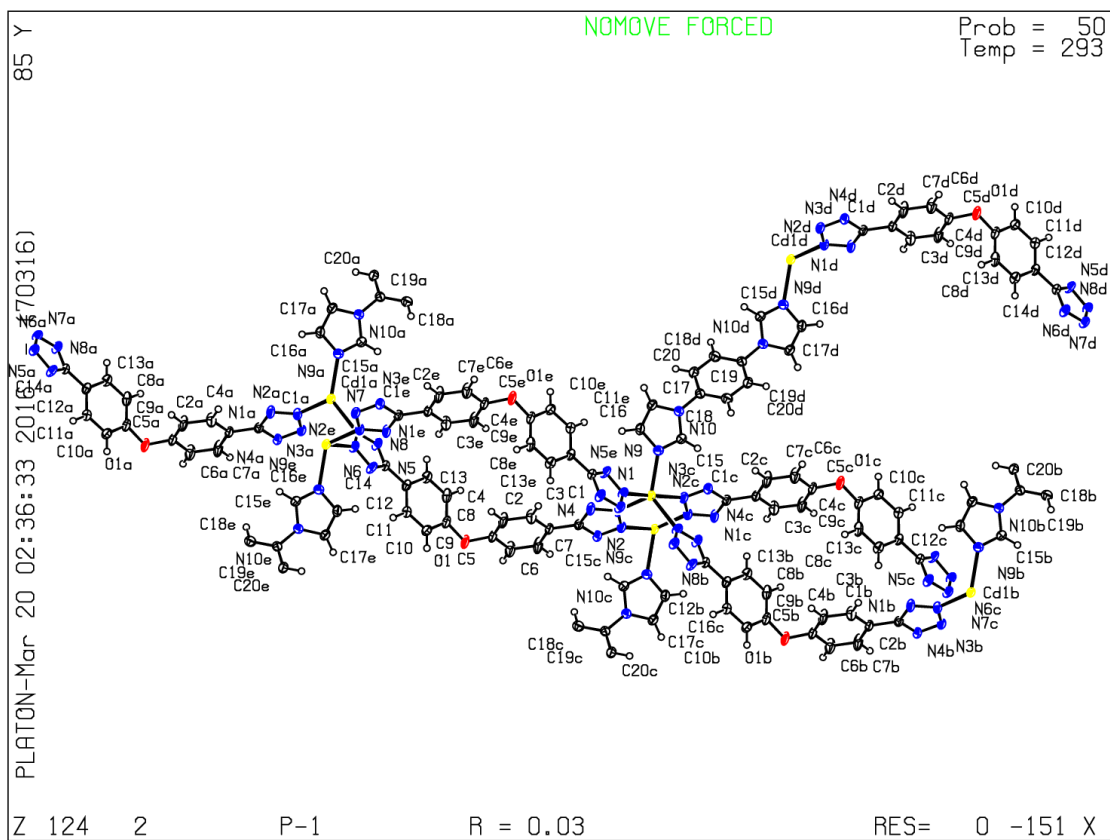

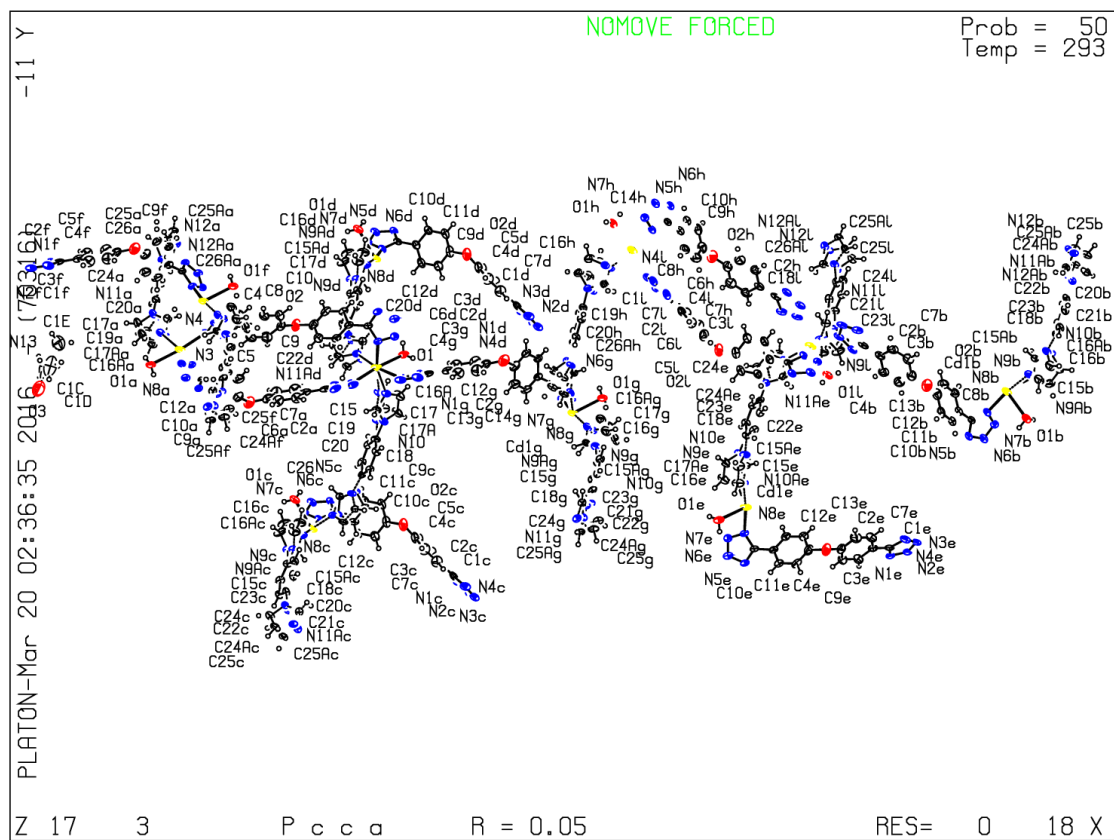

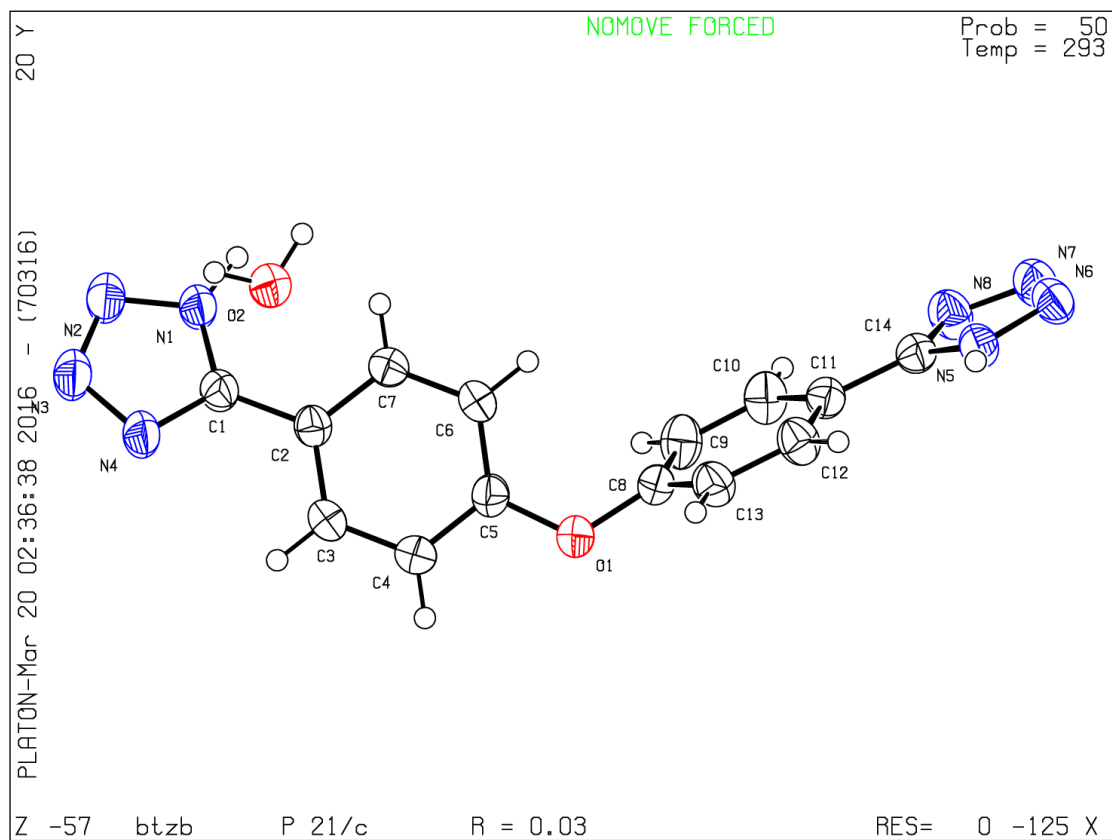

Supplement: c6ce00057f2.pdf [file c6ce00057f2.pdf]
